# Supplementary material
Source: publisher figshare collection journal article supplement (https://frontiersin.figshare.com/ndownloader/files/27074846)
Supplement: Supplementary file [file 27074846]

## Supplementary materials

Table 1

*Predicted average accuracy with 95% CI for Cohort 1 (from quadratic models)*

| Grades  | Accuracy             |                         |                          |
|---------|----------------------|-------------------------|--------------------------|
|         | Overall              | Ratio bin<br>0.30 - 060 | Ratio bin<br>0.85 – 0.87 |
| Grade 1 | 0.62<br>[0.61; 0.63] | 0.74<br>[0.72; 0.76]    | 0.58<br>[0.57; 0.60]     |
| Grade 2 | 0.65<br>[0.64; 0.66] | 0.79<br>[0.78; 0.81]    | 0.60<br>[0.59; 0.61]     |
| Grade 3 | 0.68<br>[0.67; 0.69] | 0.83<br>[0.81; 0.84]    | 0.62<br>[0.61; 0.63]     |
| Grade 4 | 0.69<br>[0.68; 0.70] | 0.85<br>[0.83; 0.86]    | 0.63<br>[0.62; 0.64]     |
| Grade 5 | 0.69<br>[0.68; 0.70] | 0.85<br>[0.84; 0.87]    | 0.63<br>[0.62; 0.64]     |

Table 2

*Predicted average accuracy and RT for correct answers with 95% CI for Cohort 2 (from quadratic models)*

| Grades  | Accuracy (% of correct answers) |                         | RT for correct answers (in sec.) |                         |                          |
|---------|---------------------------------|-------------------------|----------------------------------|-------------------------|--------------------------|
|         | Overall                         | Ratio bin<br>0.30 - 060 | Overall                          | Ratio bin<br>0.30 - 060 | Ratio bin<br>0.85 – 0.87 |
| Grade 5 | 0.68<br>[0.66; 0.69]            | 0.82<br>[0.80; 0.84]    | 1.05<br>[1.01; 1.08]             | 1.03<br>[1.00; 1.07]    | 1.07 [1.03;<br>1.11]     |
| Grade 6 | 0.68<br>[0.67; 0.69]            | 0.83<br>[0.82; 0.85]    | 0.94<br>[0.91; 0.96]             | 0.91<br>[0.89; 0.93]    | 0.95<br>[0.92; 0.98]     |
| Grade 7 | 0.70<br>[0.69; 0.71]            | 0.85<br>[0.84; 0.87]    | 0.87<br>[0.85; 0.90]             | 0.83<br>[0.81; 0.85]    | 0.88<br>[0.85; 0.91]     |
| Grade 8 | 0.72<br>[0.71; 0.73]            | 0.88<br>[0.87; 0.89]    | 0.86<br>[0.84; 0.88]             | 0.80<br>[0.78; 0.82]    | 0.88<br>[0.85; 0.90]     |
| Grade 9 | 0.75<br>[0.74; 0.76]            | 0.92<br>[0.91; 0.94]    | 0.90<br>[0.87; 0.92]             | 0.81<br>[0.79; 0.84]    | 0.93<br>[0.90; 0.96]     |

Table 3

*Descriptive statistics for general PS*

| Cohort | Grade   | Reaction time (sec.) |      |            |
|--------|---------|----------------------|------|------------|
|        |         | Mean                 | SD   | 95% CI     |
| First  | Grade 1 | 1.25                 | 0.29 | 1.21; 1.29 |
|        | Grade 2 | 1.07                 | 0.24 | 1.04; 1.10 |
|        | Grade 3 | 1.02                 | 0.31 | 0.98; 1.06 |
|        | Grade 4 | 0.92                 | 0.27 | 0.89; 0.95 |
|        | Grade 5 | 0.93                 | 0.30 | 0.89; 0.97 |
| Second | Grade 5 | 0.78                 | 0.18 | 0.76; 0.81 |
|        | Grade 6 | 0.74                 | 0.17 | 0.72; 0.76 |
|        | Grade 7 | 0.70                 | 0.15 | 0.68; 0.72 |
|        | Grade 8 | 0.69                 | 0.14 | 0.67; 0.70 |
|        | Grade 9 | 0.65                 | 0.13 | 0.63; 0.67 |

Table 4

*Cohort 1: Results of ME growth models for changes in general PS (in sec.) from grade 1 to grade 5*

| Variables                              | Baseline       | Model 1          | Model 2          | Model 3                 |
|----------------------------------------|----------------|------------------|------------------|-------------------------|
|                                        | Intercept-only | Linear growth    | Nonlinear growth | Model with random slope |
|                                        | B (s.e.)       | B (s.e.)         | B (s.e.)         | B (s.e.)                |
| <i>Fixed effect</i>                    |                |                  |                  |                         |
| Constant                               | 1.03*** (0.01) | 1.19*** (0.02)   | 1.24*** (0.02)   | 1.24*** (0.02)          |
| Time                                   |                | -0.08*** (0.005) | -0.17*** (0.02)  | -0.17*** (0.02)         |
| Time <sup>2</sup>                      |                |                  | 0.02*** (0.004)  | 0.02*** (0.004)         |
| <i>Random effect</i>                   |                |                  |                  |                         |
| Intercept variance                     | 0.03           | 0.03             | 0.03             | 0.04                    |
| Residuals                              | 0.07           | 0.05             | 0.05             | 0.04                    |
| Slope variance (time)                  |                |                  |                  | 0.005                   |
| Covariance between intercept and slope |                |                  |                  | -0.006                  |
| Log-likelihood                         | -200.255       | -91.19           | -73.12           | -41.26                  |
| LR test ( $\Delta$ df)                 |                | 218.13*** (1)    | 36.14*** (1)     | 63.73*** (2)            |
| ICC                                    | .30            |                  |                  |                         |

\*\*\* $p < .001$

Table 5

*Cohort 2: Results of ME growth models for changes in general PS (in sec.) from grade 5 to grade 9*

| Variables                              | Baseline       | Model 1          | Model 2          | Model 3                 |
|----------------------------------------|----------------|------------------|------------------|-------------------------|
|                                        | Intercept-only | Linear growth    | Nonlinear growth | Model with random slope |
|                                        | B (s.e.)       | B (s.e.)         | B (s.e.)         | B (s.e.)                |
| <i>Fixed effect</i>                    |                |                  |                  |                         |
| Constant                               | 0.71*** (0.01) | 0.77*** (0.01)   | 0.78*** (0.01)   | 0.77*** (0.01)          |
| Time                                   |                | -0.03*** (0.002) | -0.05*** (0.01)  | -0.03*** (0.002)        |
| Time <sup>2</sup>                      |                |                  | 0.004 (0.002)    |                         |
| <i>Random effect</i>                   |                |                  |                  |                         |
| Intercept variance                     | 0.01           | 0.01             | 0.01             | 0.01                    |
| Residuals                              | 0.02           | 0.014            | 0.014            | 0.013                   |
| Slope variance (time)                  |                |                  |                  | 0.0005                  |
| Covariance between intercept and slope |                |                  |                  | -0.002                  |
| Log-likelihood                         | 492.17         | 556.71           | 558.06           | 562.69                  |
| LR test ( $\Delta$ df)                 |                | 129.08*** (1)    | 2.70 (1)         | 11.96** (2)             |
| ICC                                    | .36            |                  |                  |                         |

\*\*\* $p < .001$ , \*\* $p < .01$

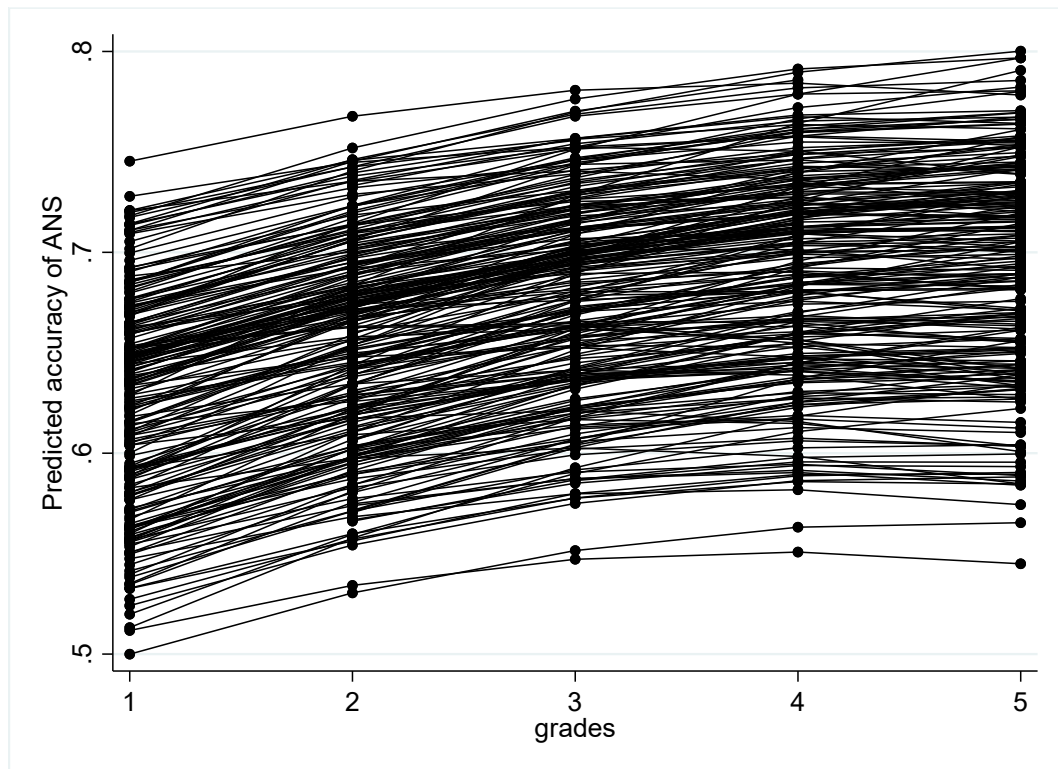

*Figure 1.* Individual trajectories of the development of ANS accuracy from grade 1 to grade 5 (Cohort 1)

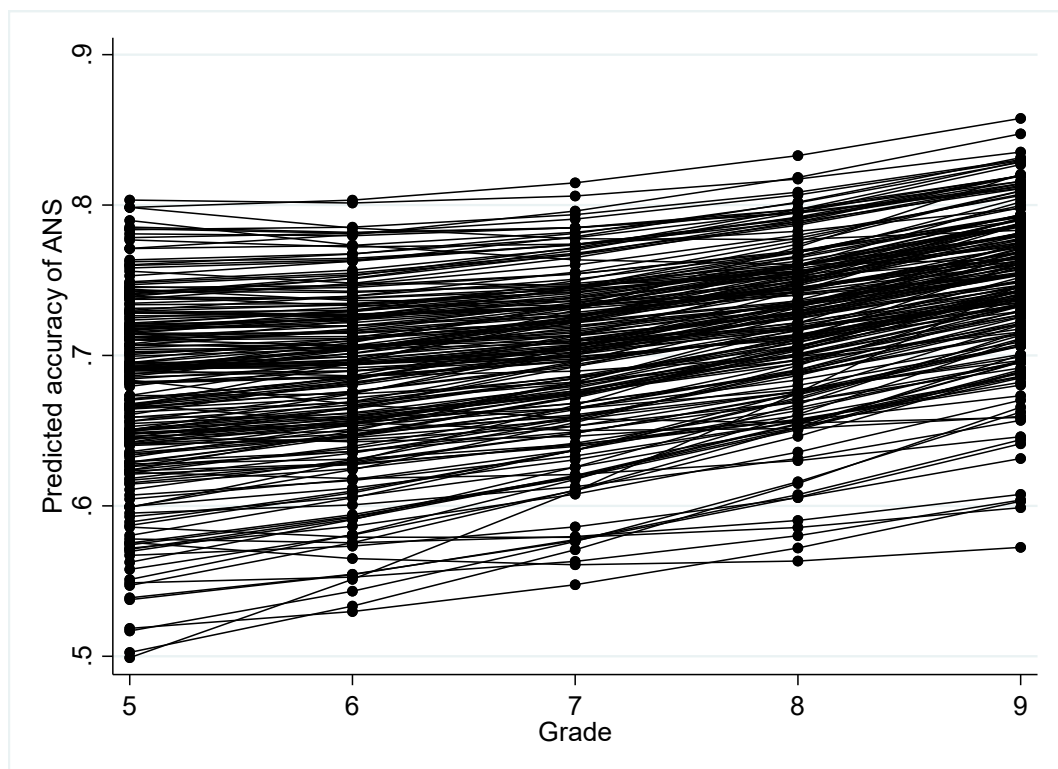

*Figure 2.* Individual trajectories of the development of ANS accuracy from grade 5 to grade 9

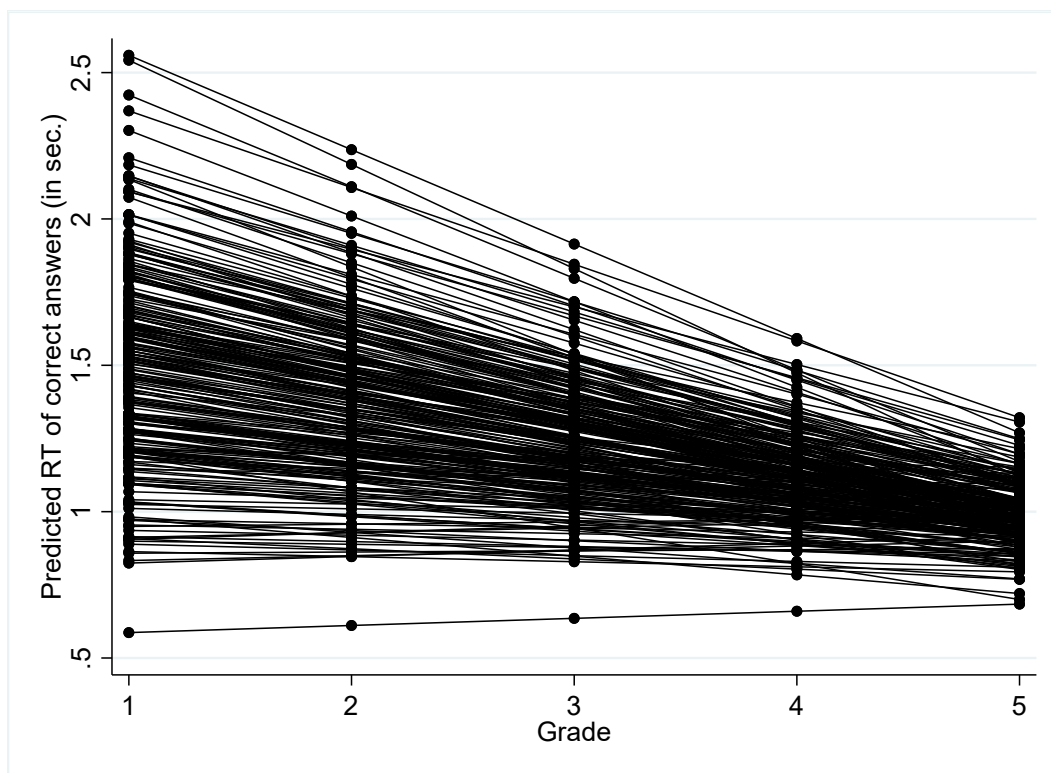

*Figure 3.* Individual predicted trajectories of changes in ANS RT from grade 1 to grade 5

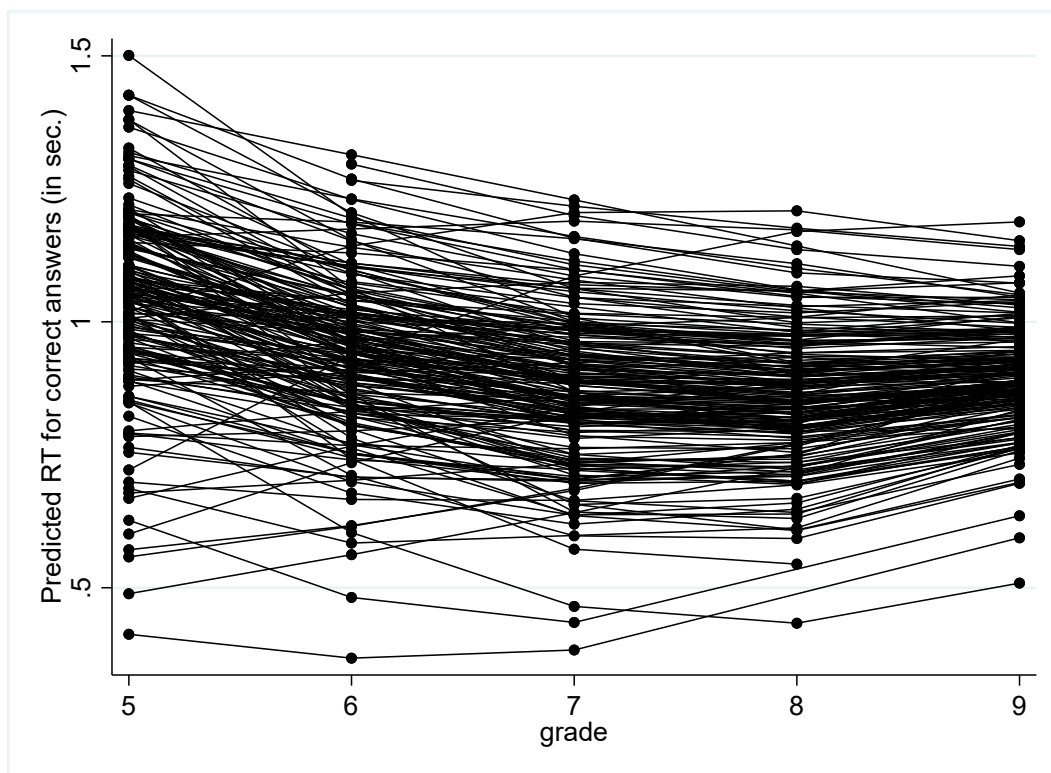

*Figure 4.* Individual predicted trajectories of changes in ANS RT from grade 5 to grade 9

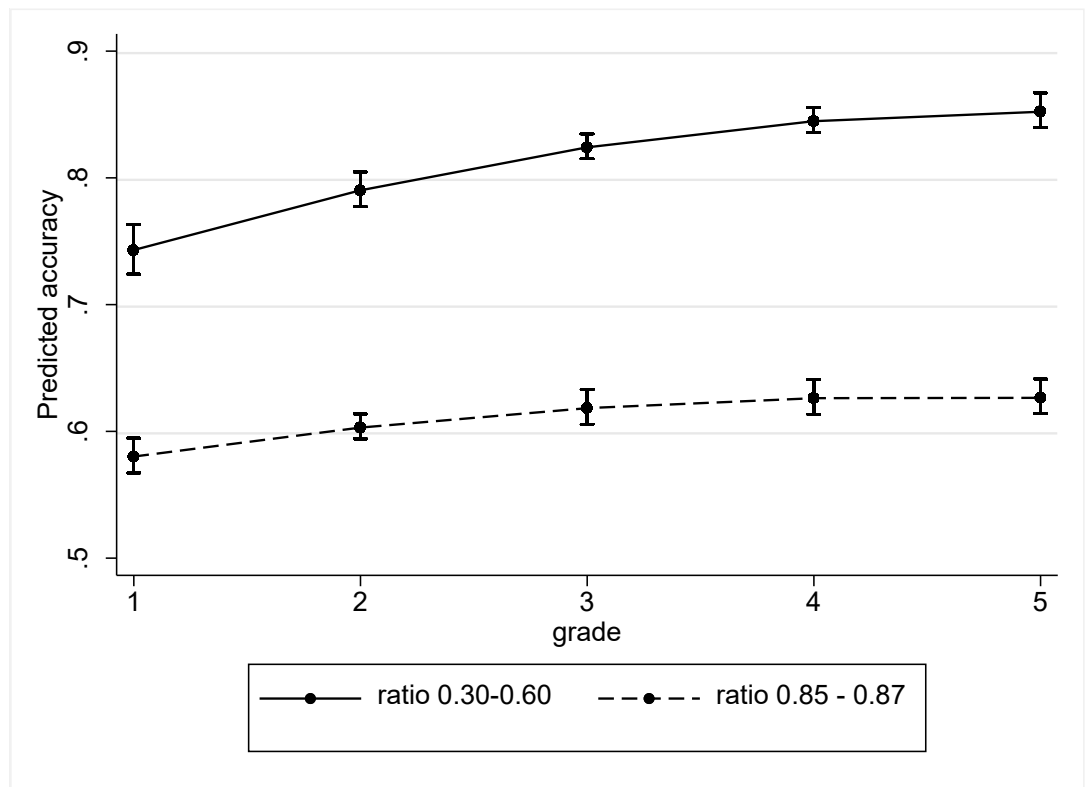

Figure 5. The average growth in ANS accuracy for the easiest and hardest ratio bins with 95% CI for Cohort 1 (grades 1–5)

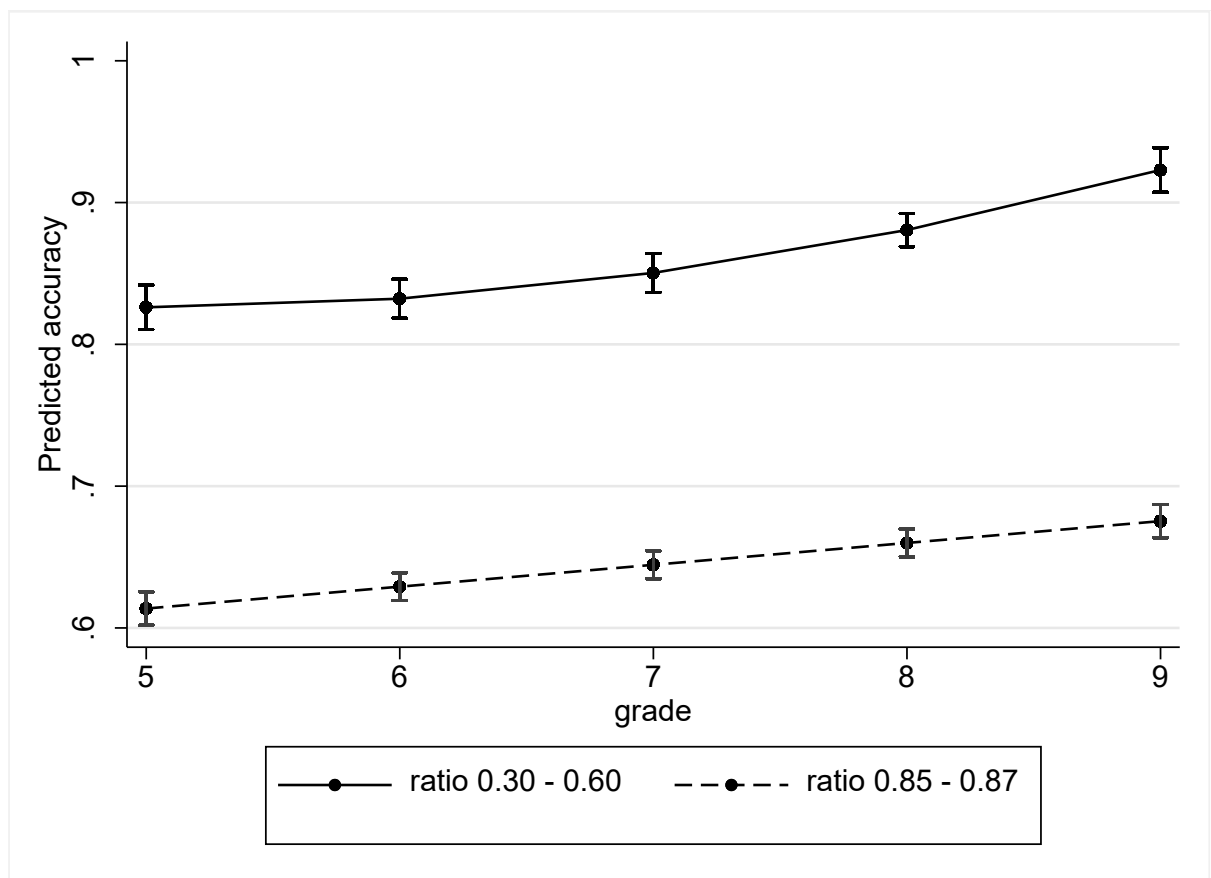

Figure 6. The average growth in ANS accuracy with 95% CI for the easiest and hardest ratio bins for Cohort 2 (grades 5–9)

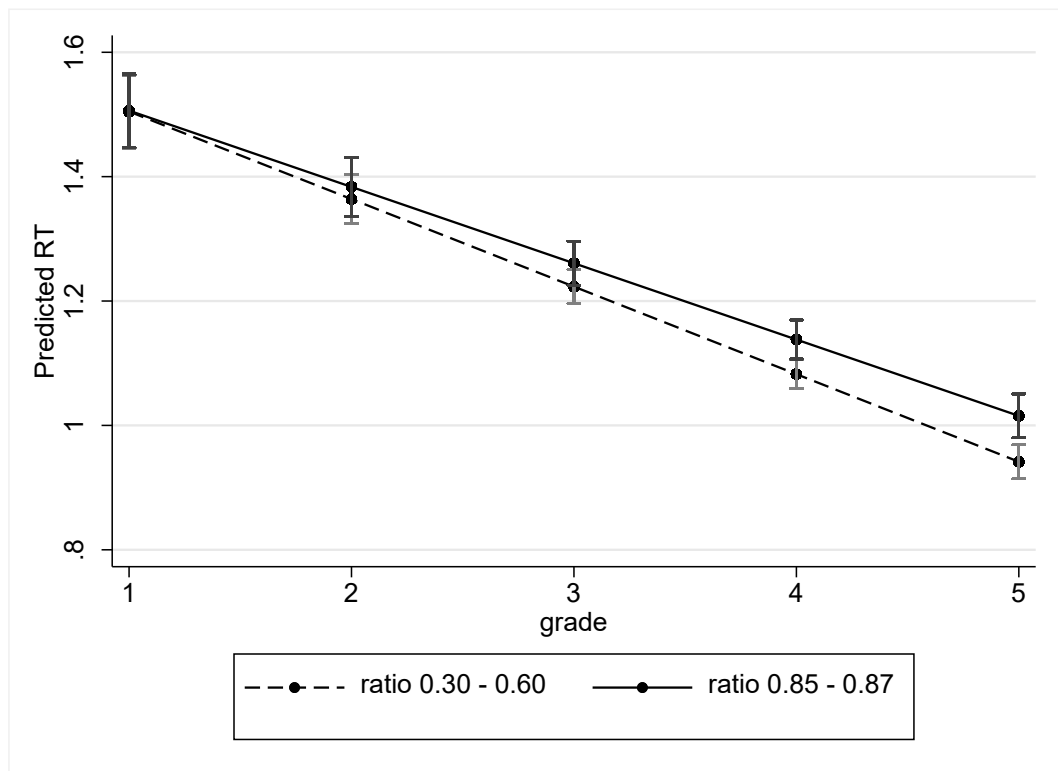

Figure 7. Predicted changes in ANS RT with 95% CI for two ratio bins for Cohort 1 (grades 1–5)

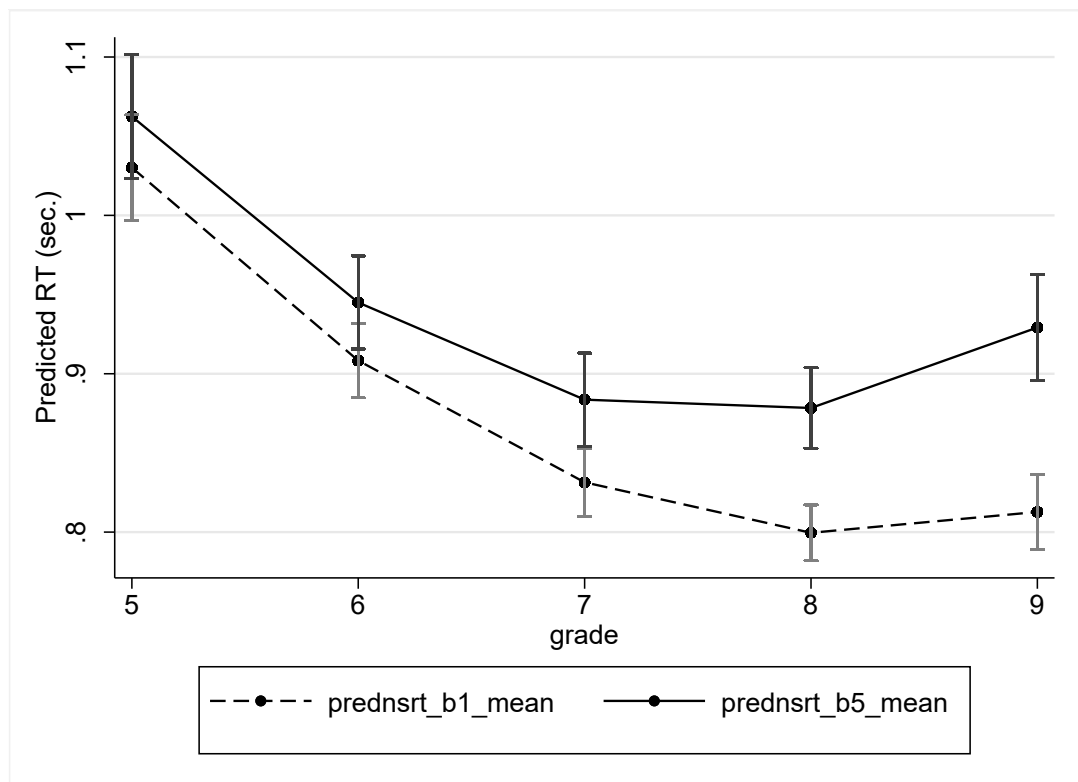

Figure 8. Predicted changes in ANS RT with 95% CI for two ratio bins for Cohort 2 (grades 5–9)

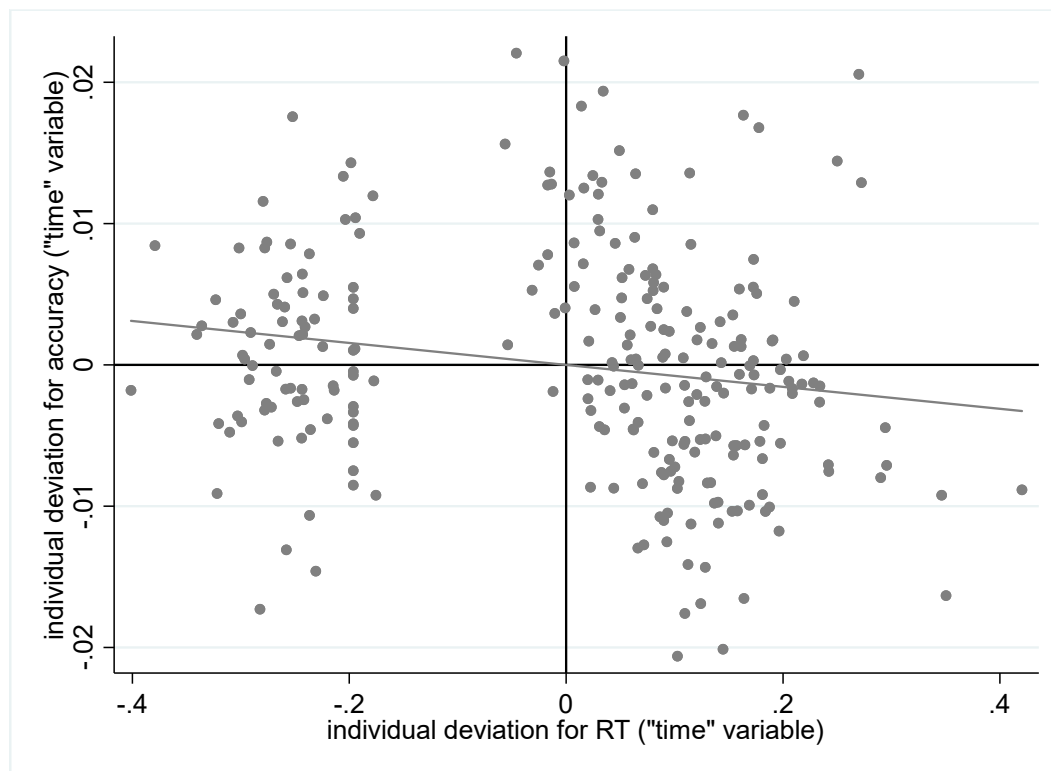

*Figure 9.* The correlation between individual deviation from the average value of time changes in accuracy and RT for Cohort 1 (grades 1–5)

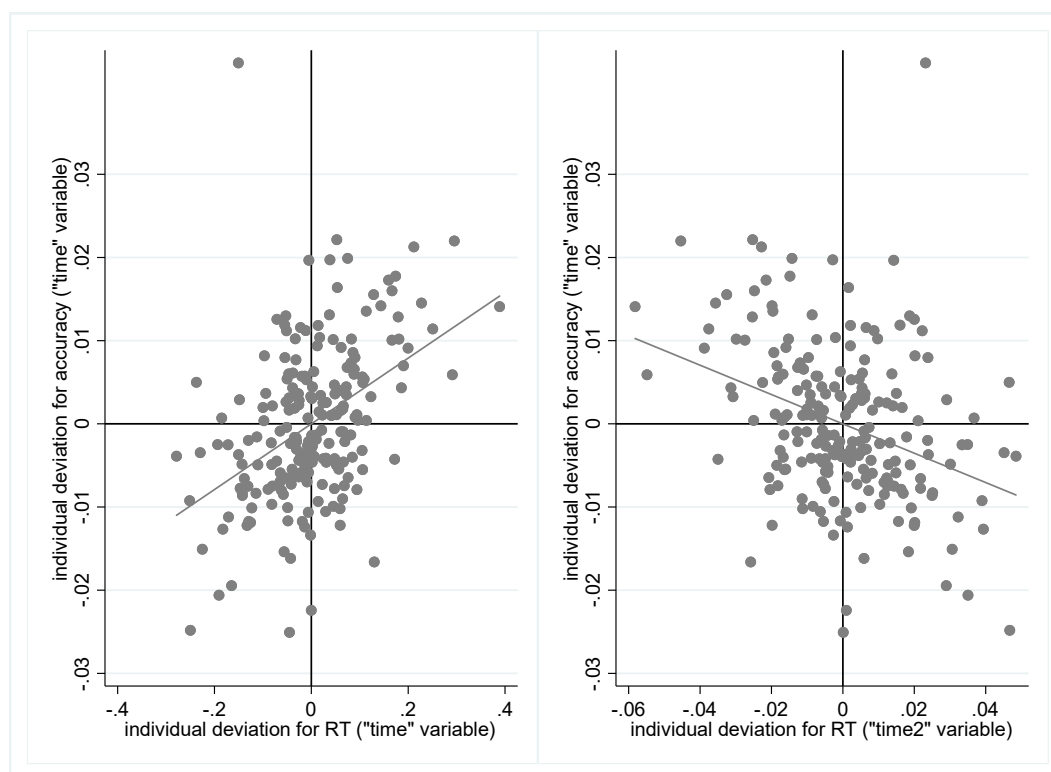

*Figure 10.* The correlation between individual deviation from the average value of time changes in accuracy and RT for Cohort 2 (grades 5–9)
